# Supplementary material for: Personality underground: evidence of behavioral types in the solitary subterranean rodent Ctenomys talarum
Source: PeerJ. 2020 Feb 18;8:e8490. doi: 10.7717/peerj.8490 (PMC7034374; doi:10.7717/peerj.8490)
Supplement: Supplemental Information 1 [file peerj-08-8490-s001.xlsx]

## Sheet: Hoja1
	ID	1		2		3		4		5		6		7		8		9		10		11		12		13		14		15		16		17		18		19		20		21
TRIAL	behavior/ series	I	II	I	II	I	II	I	II	I	II	I	II	I	II	I	II	I	II	I	II	I	II	I	II	I	II	I	II	I	II	I	II	I	II	I	II	I	II	I	II	I	II
OF	latency to OF	1217	50	912	1800	68	1800	54	95	197	13	77	18	1662	1800	1800	1041	230	1800	165	34	30	21	71	1201	5	61	48	37	17	25	55	164	1800	1800	1800	1800	368	45	21	24	133	36
	total entrance frequency	12	3	3	0	4	0	5	7	7	9	8	12	4	0	0	7	5	0	4	9	4	2	4	4	12	8	9	5	9	8	3	3	0	0	0	0	14	6	9	12	8	5
	total distance travelled	439	857	161	0	217	0	225	334	338	464	382	329	158	0	0	566	252	0	201	308	319	364	149	146	374	338	365	419	644	434	559	524	0	0	0	0	519	244	331	179	356	296
	tien in OF	557	596	186	0	308	0	393	542	417	492	467	361	248	0	0	544	358	0	206	289	473	556	274	165	415	505	519	575	528	511	541	568	0	0	0	0	456	363	419	270	313	399
	total time moving	416.46	448.24	53.27	0	116.85	0	293.97	326.7	331.6	341.12	305.97	228.9	153.19	0	0	373.99	209.87	0	148.4	199.5	262.38	360.82	194.76	88.79	270.27	314.99	293.41	399.08	172.11	307.59	402.48	433.1	0	0	0	0	319.45	246.96	249.78	179.12	178.47	241.6
	time in center	0.0551346	0.0186581	23.38	0	23.86	0	23.35	56.26	41.94	55.1	22.55	18.87	18.44	0	0	56.09	25.21	0	32.43	24.15	27.04	73.62	7.24	0.34	28.19	38.38	58.22	59.19	50.48	63.65	49.74	104.14	0	0	0	0	49.01	45.13	59.46	19.61	50.89	30.12
	frequency of rearing (total)	77	232	10	0	29	0	66	110	85	186	60	94	45	0	0	96	71	0	38	88	65	91	20	74	61	118	66	111	120	103	60	81	0	0	0	0	80	80	80	63	72	66
	f scratching total	19	124	22	0	9	0	18	34	32	44	45	40	20	0	0	28	34	0	3	14	6	1	15	2	3	30	9	4	25	22	3	26	0	0	0	0	22	13	26	6	17	9
ENC	latency to arena	925	13.81	69.18	488	276.92	394	121.4	161.5	388.56	6.68	31.06	12.37	92.19	1800	1800	1445.91	431	742.03	407.5	13.44	65	19.13	942.44	470.94	16.31	10.5	51.19	11.18	1.81	4.11	14	524.91	1800	25.84	1800	27.41	137.97	26.22	12.43	11.97	13.68	21.81
	time in the arena	315	34	110	105	3	5	329	357	11	82	531	257	92	0	0	26	469	78	202	96	375	294	159	399	189	292	186	382	161	339	447	389	0	14	0	172	248	94	168	131	215	218
	total entrance frequency	6	3	4	4	1	1	4	12	1	4	10	7	2	0	0	2	4	5	3	5	8	7	1	3	5	5	6	6	9	10	9	4	0	1	0	4	7	5	8	5	6	6
	total time scratching	12.51	0	76	0	0	0	87.23	105.96	1	0	99.63	116.17	4.37	0	0	0	128.13	0	40.65	0	111.24	75	0	207.97	50.82	17.98	49.32	124.13	0	172.31	49.51	187.9	0	0	0	0	2.91	0	0	0	0	5.91
	total fleeing	0	0	0	0	0	0	0	0	1	3	0	0	0	0	0	1	0	3	0	6	0	0	1	0	0	0	0	8	0	0	1	0	0	1	0	1	2	3	0	0	0	0
	total intrestest	40	1	16	11	0	0	53	30	0	7	33	22	13	0	0	1	34	14	22	7	52	35	14	24	40	31	37	28	21	29	55	17	0	1	0	14	48	4	12	10	14	29
	total freezeing	2	0	2	0	0	0	0	0	0	0	1	0	0	0	0	0	1	0	2	0	1	0	2	0	6	0	0	4	0	0	5	0	0	0	0	1	0	0	0	0	0	0
	total expose back	0	0	0	1	0	0	8	21	0	0	1	2	0	0	0	0	11	1	2	4	0	11	5	4	11	4	2	10	0	2	2	11	0	0	0	1	2	0	0	0	0	2
Ofp	latency to OF	7	21	445	505	233	1800	13	57	26	41	10	9	55	1800	641	904	15	138	223	259	144	44	511	1392	5	5	13	10	12	11	20	158	592	1800	1800	1800	387	55	36	8	44	11
	total entrance frequency	6	1	5	4	5	0	11	6	14	10	5	19	4	0	7	5	7	4	7	8	8	9	4	7	6	4	7	7	10	10	13	3	11	0	0	0	4	5	17	12	6	3
	total distance travelled	660	1127	157	297	248	0	261	191	407	492	365	320	213	0	467	397	358	147	177	291	424	318	220	188	347	204	350	442	549	575	456	530	378	0	0	0	298	384	274	136	295	436
	tien in OF	443	600	300	540	347	0	440	357	558	404	426	312	315	0	568	548	578	306	219	300	451	371	388	340	478	367	395	566	521	555	443	580	385	0	0	0	312	469	364	233	365	495
	total time moving	325.55	507.55	64.5	308.43	172.66	0	245.06	212.22	351.95	239.97	268.45	227.68	210.53	0	340	294.61	359.72	180.39	147.38	185.08	180.18	225.13	143.4	206.43	296.67	219.81	195.59	382.17	336.5	380.84	311.74	402.14	262.29	0	0	0	150.69	312.03	214.49	142.6	199.33	265.62
	time in center	20.02	8.61	29.48	74.45	36.46	0	85.91	71.96	58.39	65.33	50.57	44.21	77.96	0	147.71	124.71	120.05	35.67	61.33	50.59	136.18	49.02	38.65	36.54	127.08	31.61	76.09	125.02	113.17	89.12	73.3	190.43	77.22	0	0	0	28.61	62.34	68.57	65.97	37.52	54.64
	frequency of rearing (total)	105	217	25	55	40	0	61	61	148	156	109	112	78	0	65	51	112	27	48	72	89	56	90	83	90	86	104	77	161	206	52	72	94	0	0	0	116	110	80	39	96	139
	f scratching total	64	45	19	10	12	0	14	21	88	41	50	36	27	0	26	26	36	15	23	25	11	12	47	47	21	35	51	7	77	116	4	8	14	0	0	0	28	25	15	3	36	63
	latency to invest odour desde ingreso a ca	9	0	25	3	58	1800	102	29	69	30	98	20	3	1800	169	43	53	71	39	72	37	30	119	51	4	182	41	74	34	49	41	6	6	1800	1800	1800	73	30	54	56	113	3
	total time close to odour	7.12	0	6.53	13.5	9.17	0	20.25	12.13	17.09	12.99	9.09	8.22	38.85	0	35.77	21.13	28.38	5.32	154.48	12.32	23.45	6.05	10.64	6.77	67.45	7.96	31.52	21.52	52.57	23.64	17.2	83.24	21.72	0	0	0	13.02	23.73	23.29	24.31	13.36	17.18
	total f sniffing	3	2	4	8	4	0	4	9	10	8	7	10	9	0	13	6	9	5	9	6	8	5	4	5	9	4	13	12	11	14	7	21	9	0	0	0	3	5	8	7	4	6
	time sniff	4.7	2.68	7.42	12.42	5.74	0	21.41	7.5	12.32	4.82	6.68	8.75	35.54	0	13.97	12.74	25.5	4.46	33.39	13.02	10.22	4.96	5.76	3.07	60.31	4.05	20.66	16.65	51.34	18.33	14.4	64.48	11.02	0	0	0	11.21	18.3	18.21	19.68	11.42	14.14
	maximun sprint	0.67		2.11		1.32		1.81		0.94		1.28		1.38		1.25		1.37		1.24		1.58		2.03		1.38		1.74		1		1.34		1.53		1.75		1.57		1.39		1.25
	Behaviors recorded during quick essay
	time moving	59.44		146		86		155		103		94		46		100		118		62		91		63		70		131		86		74		104		90		61		66		54
	time inside refuge	0		0		4		29		0		0		12		44		0		0		19		22		11		6		10		4		3		9		0		9		1
	frequency of freezing	0		0.2		0		0		1		3		3		2		1		1		2		0		0		2		0		9		0		1		5		0		4
	time resting	1		0		0		0		62		0		80		21		13		22		0		0		0		0		0		0		7		28		0		0		0
	frequency of sniffing	0		6		14		0		2		0		3		7		16		6		16		21		15		17		9		14		16		20		12		5		16
