# Supplementary material for: Personality underground: evidence of behavioral types in the solitary subterranean rodentCtenomys talarum
Source: PeerJ journal article supplement (doi:10.7717/peerj.8490), 2020-02-18

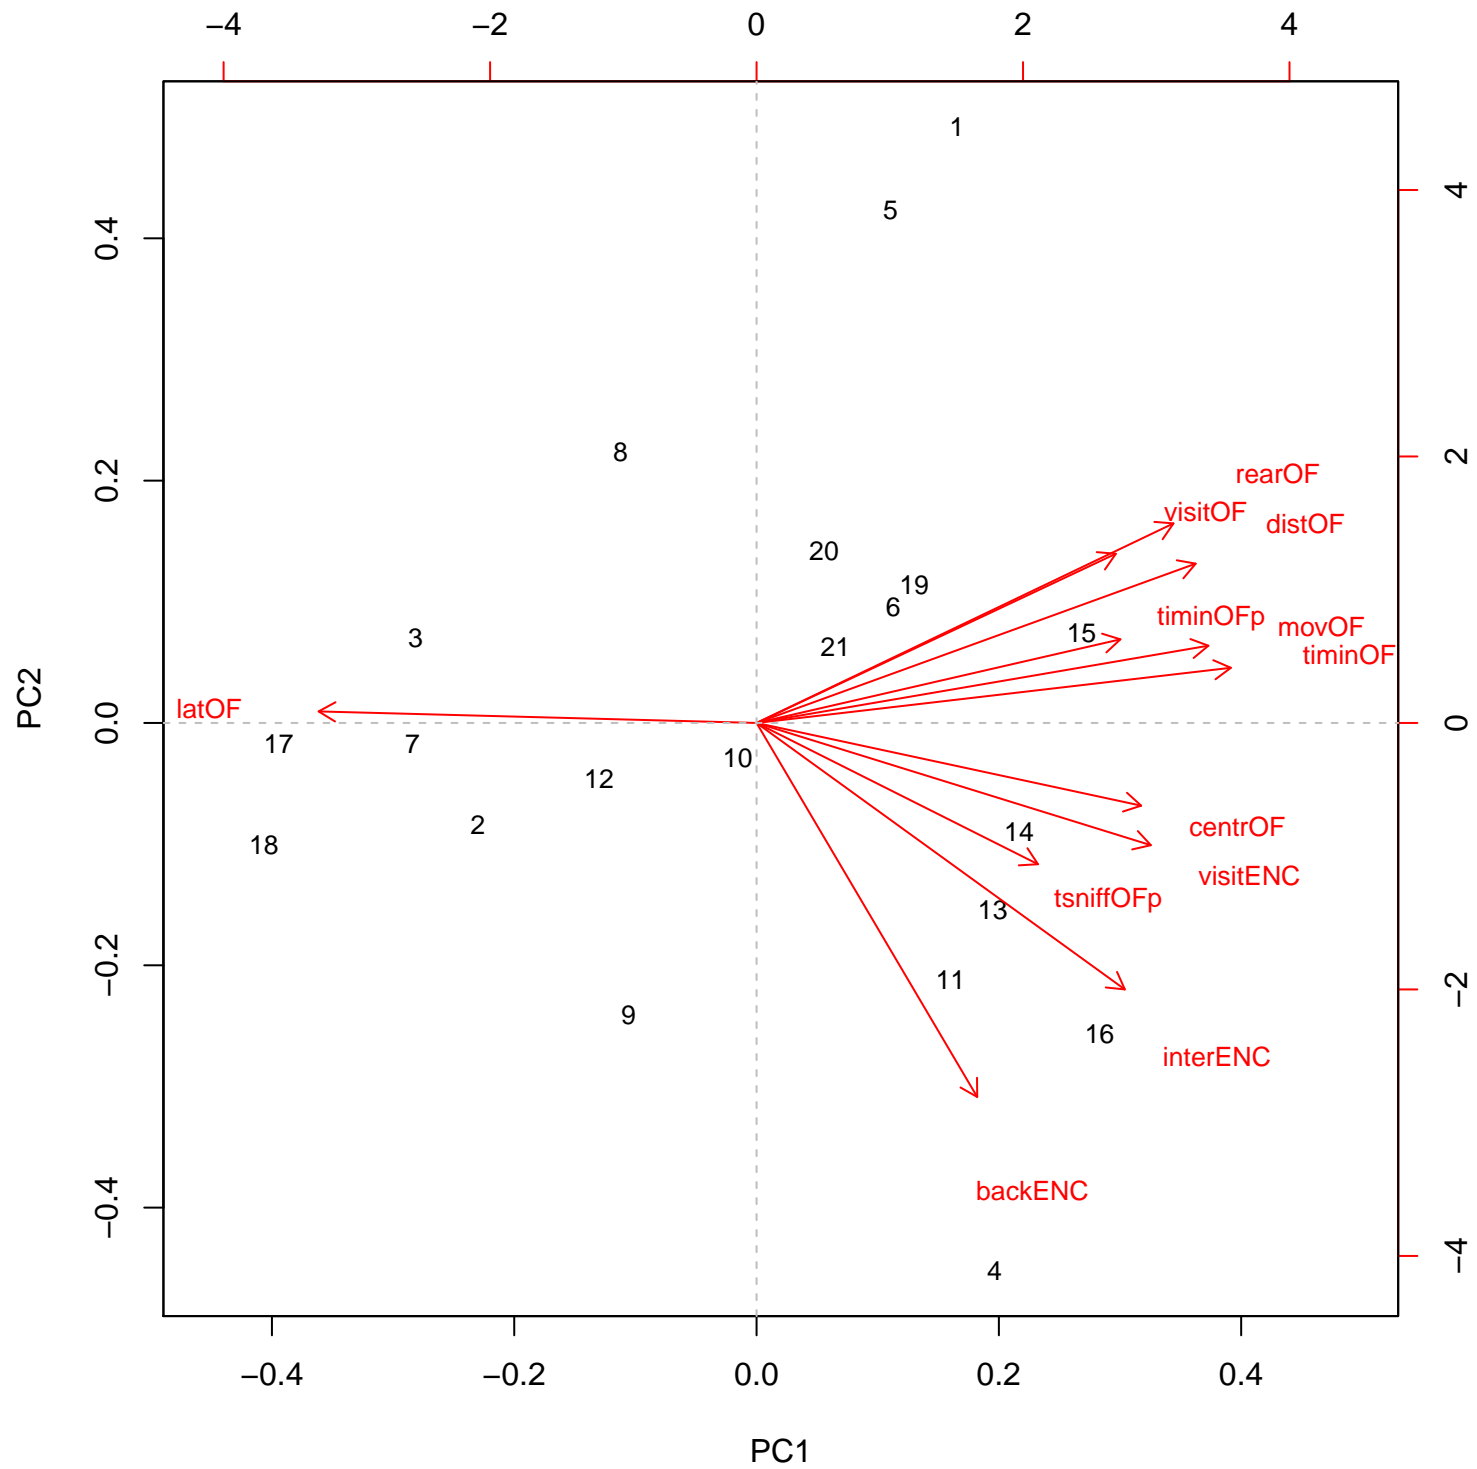

Supplement: Supplemental_Figure_S1.pdf [file Supplemental_Figure_S1.pdf]
